# Supplementary material
Source: PubMed Central journal article supplement (PMC8594607)
Supplement: iai.00463-21-s0001.pdf [file iai.00463-21-s0001.pdf]

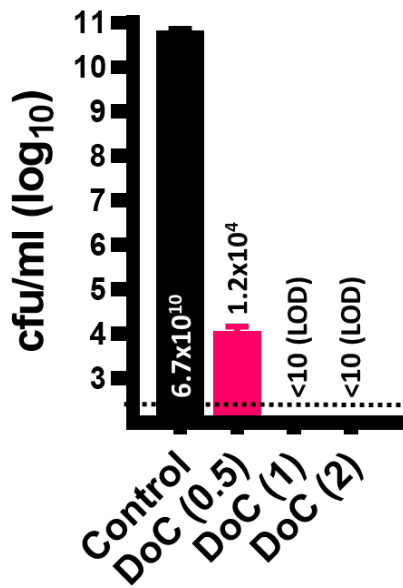

**Supplemental Figure 1. Deoxycholic acid killing of *S. pneumoniae* strain TIGR4 inoculated into CAMHB with 3% lysed horse blood.** *S. pneumoniae* strain TIGR4 was inoculated at a density of  $\sim 5.15 \times 10^8$  cfu/ml into CAMHB-LHB and left untreated (control) or treated with 0.5, 1, or 2 mg/ml of deoxycholic acid (DoC). Bacteria were incubated  $\sim 20$  h at 37°C in a 5% CO<sub>2</sub> atmosphere after which the cultures were serially diluted and plated onto blood agar plates to obtain the density (cfu/ml). Error bars represent the standard errors of the means calculated using data from at least three independent experiments. The median density is shown inside the control bar or above DoC (0.5). Limit of detection (LOD) was  $<10$  cfu/ml.

**Supplemental Table 1. *Streptococcus pneumoniae* invasive isolates challenged with DoC (0.5 mg/ml).**

| <b>Pneumococcal strain (serotype<sup>#</sup>)</b> | <b>Untreated (cfu/ml)</b> | <b>DoC** (cfu/ml)</b> |
|---------------------------------------------------|---------------------------|-----------------------|
| 2011215303 (1 <sup>#</sup> )                      | 2.50E+07*                 | <10                   |
| 2012002345 (1 <sup>#</sup> )                      | 2.40E+07*                 | <10                   |
| PATH4426 (2 <sup>#</sup> )                        | 3.40E+07                  | <10                   |
| PATH4299 (2 <sup>#</sup> )                        | 1.50E+07                  | <10                   |
| 2011212843 (3 <sup>#</sup> )                      | 1.35E+07*                 | <10                   |
| 2012211690 (3 <sup>#</sup> )                      | 2.30E+07*                 | <10                   |
| 2011215139 (4 <sup>#</sup> )                      | 3.45E+07*                 | <10                   |
| 2012204622 (4 <sup>#</sup> )                      | 3.75E+07*                 | <10                   |
| 2012211691 (5 <sup>#</sup> )                      | 2.15E+07*                 | <10                   |
| 2010220227 (5 <sup>#</sup> )                      | 5.85E+07*                 | <10                   |
| PATH2287 (5 <sup>#</sup> )                        | 3.30E+07                  | <10                   |
| PATH3692 (5 <sup>#</sup> )                        | 3.10E+07                  | <10                   |
| 2011038434 (6A <sup>#</sup> )                     | 2.60E+07                  | <10                   |
| 2012002049 (6A <sup>#</sup> )                     | 3.70E+07*                 | <10                   |
| 2012218655 (6B <sup>#</sup> )                     | 1.10E+07                  | <10                   |
| 2012203875 (6B <sup>#</sup> )                     | 1.30E+07                  | <10                   |
| 2012214337 (7F <sup>#</sup> )                     | 1.40E+07                  | <10                   |
| 2012218160 (9V <sup>#</sup> )                     | 9.30E+07                  | <10                   |
| 2011212767 (9V <sup>#</sup> )                     | 4.00E+07                  | <10                   |
| PATH2460 (10C)                                    | 3.70E+07                  | <10                   |
| PATH5024 (12F <sup>#</sup> )                      | 3.00E+07                  | <10                   |
| PATH6311 (12F <sup>#</sup> )                      | 2.70E+07                  | <10                   |
| PATH3602 (12F <sup>#</sup> )                      | 3.40E+07                  | <10                   |
| 2012203946 (14 <sup>#</sup> )                     | 2.30E+07                  | <10                   |
| 2012208112 (14 <sup>#</sup> )                     | 2.90E+07                  | <10                   |
| PATH4013 (15B <sup>#</sup> )                      | 2.60E+07                  | <10                   |
| PATH3584 (15B <sup>#</sup> )                      | 2.50E+07                  | <10                   |
| PATH3484 (15B <sup>#</sup> )                      | 3.00E+07                  | <10                   |
| 2012214409 (18C <sup>#</sup> )                    | 7.40E+06                  | <10                   |
| 2012205120 (18C <sup>#</sup> )                    | 2.40E+07                  | <10                   |
| 2012215778 (19A <sup>#</sup> )                    | 2.10E+07                  | <10                   |
| 2011212959 (19A <sup>#</sup> )                    | 1.90E+07                  | <10                   |
| 2012205131 (19F <sup>#</sup> )                    | 3.40E+07                  | <10                   |
| 2012214924 (19F <sup>#</sup> )                    | 2.50E+07                  | <10                   |
| 2012218064 (23F <sup>#</sup> )                    | 3.20E+07                  | <10                   |

|                                |          |     |
|--------------------------------|----------|-----|
| 2011214535 (23F <sup>#</sup> ) | 2.10E+07 | <10 |
| PATH4059 (33F <sup>#</sup> )   | 2.70E+07 | <10 |
| PATH4373 (33F <sup>#</sup> )   | 2.60E+07 | <10 |
| 2011215189 (42)                | 1.90E+07 | <10 |

\*Median of at least three biological replicates. \*\*Incubated for 2 h with 0.5 mg/ml of DoC. <sup>#</sup>Vaccine serotype, either PCV13 or PPSV23. Isolates provided by CDC.
